# Supplementary material
Source: MDPI journal article supplement (https://www.mdpi.com/2075-5309/12/10/1557)
Supplement: s1 [file s1 › buildings-1822258-supplementary.pdf]

## QUESTIONNAIRE

A research is being conducted on Construction 4.0 Application: Industry 4.0, Internet of Things (IoT) and Lean Construction Tools Application In Quality Management of Residential Building Projects on some construction site and project variables. This is being undertaken to increase sensitization about the Construction 4.0 and Industry 4.0. A set of questionnaire to assist you in completing this assignment is attached. Your sincere response to the questions is requested. It is intended that the information gathered to be used exclusively for scholarly reasons and that it would be kept completely confidential.

Thank you in advance for your anticipated assistance.

Yours faithfully,

### Section A: General Information of Respondent and Organization

1. Name of Organization .....
2. Gender: Male ☐ Female ☐
3. Age: a.21-30yrs ☐ b. 31-40yrs ☐ c. 41-50yrs ☐
4. Type of Organization  
(a) Small scale ☐ (b) Medium scale ☐ (c) Large scale ☐ (d) others  
If others, please specify.....
5. Position in Organization: Project manager ☐ Design Specialist ☐ Project Coordinator ☐
6. Company Status a. Developer ☐ b. Contractor ☐ c. Contractor ☐ d. Client ☐  
e. Consultant ☐ .
7. Education qualification of the respondent (tick as appropriate)  
(a) W.A.S.C.E ☐ (b) OND/NCE ☐ (c) B.Sc ☐ (d) M.Sc ☐ (e) others ☐  
If others, please specify .....
8. Designation of the respondent  
(a) Architect ☐ (b) Builder ☐ (c) Quantity Surveyor ☐ (d) Engineer ☐ (e) others  
If others, please specify .....
9. Years of working experience in the construction industry  
(a) 11-15 ☐ b.5-10 ☐ c. >5 ☐ d. 15 ☐

10. What type of project are you involved in? (Please tick as many as you have been involved in)

(a) Residential ☐ (b) Office ☐ (c) Industrial ☐ (d) Civil ☐ (e) Institutional ☐

#### Section B: Construction 4.0 Influence Parameters.

Instruction: Please tick as appropriate your level of agreement and support on Construction 4.0 Influence Parameters. Scale: **SA** (Strongly Agree-5), **A** (Agree-4), **UN** (Undecided-3), **DA** (Disagree-1), **SD** (Strongly Disagree-2]

| Construction 4.0 Influence Parameters                          | SA[5] | A[4] | N[3] | SD[2] | D[1] |
|----------------------------------------------------------------|-------|------|------|-------|------|
| Intelligence Manufacturing                                     |       |      |      |       |      |
| Development of Digitalization Initiative in quality management |       |      |      |       |      |
| Additive Manufacturing                                         |       |      |      |       |      |
| Artificial Intelligence in quality management                  |       |      |      |       |      |
| Mobile Computing System for quality management                 |       |      |      |       |      |
| Social media and Multimedia System                             |       |      |      |       |      |
| Innovative Robotics in quality assurance                       |       |      |      |       |      |
| Automation of Construction Systems quality management          |       |      |      |       |      |
| Big data application                                           |       |      |      |       |      |
| Cloud Computing and Applications                               |       |      |      |       |      |
| Virtual Reality and Augmentation                               |       |      |      |       |      |
| 3D-Printing in quality output in documentation                 |       |      |      |       |      |
| Expert system and Neural Networking                            |       |      |      |       |      |

#### Section C: Internet of Things (IoT) impacts on Quality Management Process of Construction Project

Instruction: Please tick as appropriate your level of agreement and support on Internet of Things (IoT) impacts on Quality Management Process of Construction Project. Scale: **SA** (Strongly Agree-5), **A** (Agree-4), **UN** (Undecided-3), **DA** (Disagree-1), **SD** (Strongly Disagree-2]

| Construction 4.0 Influence Parameters                     | SA[5] | A[4] | N[3] | SD[2] | D[1] |
|-----------------------------------------------------------|-------|------|------|-------|------|
| Introduction of Robotics                                  |       |      |      |       |      |
| Automation in Construction                                |       |      |      |       |      |
| Additive Product Manufacturing                            |       |      |      |       |      |
| Development of Internet of Things for system development  |       |      |      |       |      |
| Mobile Computing                                          |       |      |      |       |      |
| Digitalization of Functions and Processes in Construction |       |      |      |       |      |

|                                                     |  |  |  |  |  |
|-----------------------------------------------------|--|--|--|--|--|
| Big data application in construction process        |  |  |  |  |  |
| Simulation Models Development                       |  |  |  |  |  |
| Invention of Social Media applications              |  |  |  |  |  |
| Advent of Cybernetics                               |  |  |  |  |  |
| Synthesize of Augmented Reality and Virtual Reality |  |  |  |  |  |
| Proliferation of Encoding System                    |  |  |  |  |  |
| Advent of Building Information Modelling(BIM)       |  |  |  |  |  |
| Introduction of Human Computer Interaction          |  |  |  |  |  |
| Advent of Embedded System and Encryption            |  |  |  |  |  |

Section D. Current Level of wastage threshold on construction site on account of process automation

Instruction: Please tick as appropriate your level of agreement and support on Current Level of wastage threshold on construction site on account of process automation. Scale: **SA** (Strongly Agree-5), **A** (Agree-4), **UN** (Undecided-3), **DA** (Disagree-1), **SD** (Strongly Disagree-2]

| Indicator Parameters of wastage level on site | SA[5] | A[4] | N[3] | SD[2] | D[1] |
|-----------------------------------------------|-------|------|------|-------|------|
| Extremely low level of wastage                |       |      |      |       |      |
| Moderately low level of wastage               |       |      |      |       |      |
| Low level of wastage                          |       |      |      |       |      |
| High level of wastage                         |       |      |      |       |      |
| Moderately high level of wastage              |       |      |      |       |      |
| Extremely high level of wastage               |       |      |      |       |      |

Section E: Critical Success Influencers of construction quality management using the lean construction concepts

Instruction: Please tick as appropriate your level of agreement and support on Critical Success Influencers of construction quality management using the lean construction concepts. Scale: **SA** (Strongly Agree-5), **A** (Agree-4), **UN** (Undecided-3), **DA** (Disagree-1), **SD** (Strongly Disagree-2]

| Critical Success Influencers                                          | SA[5] | A[4] | N[3] | SD[2] | D[1] |
|-----------------------------------------------------------------------|-------|------|------|-------|------|
| Leaving out non-value adding tasks focusing on value adding tasks     |       |      |      |       |      |
| Project cost reduction as a means of construction process improvement |       |      |      |       |      |

|                                                                                              |  |  |  |  |  |
|----------------------------------------------------------------------------------------------|--|--|--|--|--|
| Defining sequencing and work inventory on sites                                              |  |  |  |  |  |
| Adopting work break down structure in site waste reduction and elimination                   |  |  |  |  |  |
| Continuous flow of activities to avoid delay on site                                         |  |  |  |  |  |
| Adopting usable quality management systems in enhancing construction project characteristics |  |  |  |  |  |
| Problem detection and design to improve construction projects operations                     |  |  |  |  |  |
| Adapting the concept of Just-in-time applications in resources design and delivery on sites  |  |  |  |  |  |
| Proactive project success prediction taking value from design and client considerations      |  |  |  |  |  |
| Adopting and designing of systems for value mapping of human resources and material sourcing |  |  |  |  |  |

#### Section F: Framework Development Parameters

Instruction: Please tick as appropriate your level of agreement and support on Framework Development Parameters. Scale: **SA** (Strongly Agree-5), **A** (Agree-4), **UN** (Undecided-3), **DA** (Disagree-1), **SD** (Strongly Disagree-2]

| <b>Model Parameters</b>                                                                                                       | SA[5] | A[4] | N[3] | SD[2] | D[1] |
|-------------------------------------------------------------------------------------------------------------------------------|-------|------|------|-------|------|
| <b>Lean Thinking Parameters</b>                                                                                               |       |      |      |       |      |
| <b>Quality Cost Objective Parameters</b>                                                                                      |       |      |      |       |      |
| Allowing contingencies for tools and incidental for internal and external failure                                             |       |      |      |       |      |
| Improving construction processes thereby reducing Project cost                                                                |       |      |      |       |      |
| Benchmarking project expenditure on account of machine and plants maintenance                                                 |       |      |      |       |      |
| Minimizing expenditure to maximize profit                                                                                     |       |      |      |       |      |
| <b>Parameters on Communication, Authority and Responsibility</b>                                                              |       |      |      |       |      |
| Setting up an effective communication strategies for work quality and improvement of quality of work and operational standard |       |      |      |       |      |
| Delegation of responsibility is essential                                                                                     |       |      |      |       |      |
| Periodic establishment of quality and maintenance Management meeting on sites                                                 |       |      |      |       |      |
| Policy implementation committee need to be established                                                                        |       |      |      |       |      |
| Establishing line of command is essential                                                                                     |       |      |      |       |      |
| Identify value from the client's perspective                                                                                  |       |      |      |       |      |

|                                                                                                                           |  |  |  |  |  |
|---------------------------------------------------------------------------------------------------------------------------|--|--|--|--|--|
| Benchmarking project expenditure on account of machine and plants maintenance                                             |  |  |  |  |  |
| <b>Monitoring and controlling of quality in the Management of Construction process</b>                                    |  |  |  |  |  |
| Conceptual Phase                                                                                                          |  |  |  |  |  |
| Demonstrating organization features                                                                                       |  |  |  |  |  |
| Lean knowledge training                                                                                                   |  |  |  |  |  |
| Establish communication                                                                                                   |  |  |  |  |  |
| Review potential waste and lean practice                                                                                  |  |  |  |  |  |
| Define assessment matrices                                                                                                |  |  |  |  |  |
| <b>Lean Thinking Quality Control parameters</b>                                                                           |  |  |  |  |  |
| Pilot project implementation                                                                                              |  |  |  |  |  |
| Lean implementation documentation                                                                                         |  |  |  |  |  |
| Standardizing the lean practice                                                                                           |  |  |  |  |  |
| Employees organizing and training                                                                                         |  |  |  |  |  |
| Expanding lean practice                                                                                                   |  |  |  |  |  |
| <b>Industry 4.0 [Internet of Things Parameters]</b>                                                                       |  |  |  |  |  |
| Motion controlled lighting system should be installed to aid energy management system practices                           |  |  |  |  |  |
| Implementation of car holder energy saving switches should be connected to lighting circuits and air conditioning systems |  |  |  |  |  |
| Implementation of Building Automaton System should be used to provide data from HVAC operations                           |  |  |  |  |  |
| The use of sensory nodes of lighting and HVAC should be incorporated into building design                                 |  |  |  |  |  |
| There should be a central monitoring controlling system of electrical energy                                              |  |  |  |  |  |
| There should be implementation of smart energy management                                                                 |  |  |  |  |  |
| Smart energy-saving air conditioning system should be installed in buildings                                              |  |  |  |  |  |
| Computer-based energy management system should be adopted in buildings                                                    |  |  |  |  |  |
| Computer-based energy management system improve energy efficiency                                                         |  |  |  |  |  |
| Computer-based energy management system reduces energy waste                                                              |  |  |  |  |  |
| Introduction of Robotics                                                                                                  |  |  |  |  |  |
| Automation in Construction                                                                                                |  |  |  |  |  |
| Additive Product Manufacturing                                                                                            |  |  |  |  |  |
| Development of Internet of Things for system development                                                                  |  |  |  |  |  |

|                                                           |  |  |  |  |  |
|-----------------------------------------------------------|--|--|--|--|--|
| Mobile Computing                                          |  |  |  |  |  |
| Digitalization of Functions and Processes in Construction |  |  |  |  |  |
| Big data application in construction process              |  |  |  |  |  |
| Simulation Models Development                             |  |  |  |  |  |
| Invention of Social Media applications                    |  |  |  |  |  |
| Advent of Cybernetics                                     |  |  |  |  |  |
| Synthesization of Augmented Reality and Virtual Reality   |  |  |  |  |  |
| Proliferation of Encoding System                          |  |  |  |  |  |
| Advent of Building Information Modelling(BIM)             |  |  |  |  |  |
| Introduction of Human Computer Interaction                |  |  |  |  |  |
| Advent of Embedded System and Encryption                  |  |  |  |  |  |

Section G: Challenges associated with Application of Lean thinking

Instruction: Please tick as appropriate your level of agreement and support on Challenges associated with Application of Lean thinking. Scale: **SA** (Strongly Agree-5), **A** (Agree-4), **UN** (Undecided-3), **DA** (Disagree-1), **SD** (Strongly Disagree-2)

| Challenges associated with Application of Lean thinking                                 | SA[5] | A[4] | N[3] | SD[2] | D[1] |
|-----------------------------------------------------------------------------------------|-------|------|------|-------|------|
| Just-in-time deliveries causes congestion on the supply chain                           |       |      |      |       |      |
| Non favourable disposition of workers to the application of the principles              |       |      |      |       |      |
| Application of lean principles gives little or no space for changes in the construction |       |      |      |       |      |
| The process of management can be expensive and cost intensive                           |       |      |      |       |      |
| Reduction in flexibility to react to new conditions during execution of project         |       |      |      |       |      |
